# Supplementary material
Source: publisher figshare collection journal article supplement (https://gsajournals.figshare.com/ndownloader/files/20183150)
Supplement: Supplementary file 1 [file 20183150]

**Supplementary Table S1. Genetic properties of reference strain genomes**

| Strain | Genome size (Mb) | GC% | Replicons |
| --- | --- | --- | --- |
| Typhi str. CT18 | 5.13371 | 51.88 | chromosome:NC_003198.1/AL513382.1  plasmid pHCM1:NC_003384.1/AL513383.1  plasmid pHCM2:NC_003385.1/AL513384.1 |
| Typhi str. Ty2 | 4.79196 | 52.1 | chromosome:NC_004631.1/AE014613.1 |
| Paratyphi A str. AKU_12601 | 4.5818 | 52.2 | chromosome:NC_011147.1/FM200053.1 |
| Paratyphi B str. SPB7 | 4.85889 | 52.1 | chromosome:NC_010102.1/CP000886.1 |
| Paratyphi C str. RKS4594 | 4.88849 | 52.21 | chromosome:NC_012125.1/CP000857.1  plasmid pSPCV:NC_012124.1/CP000858.1 |
| Choleraesuis str. SC-B67 | 4.944 | 52.17 | chromosome:NC_006905.1/AE017220.1  plasmid pSC138:NC_006856.1/AY509004.1  plasmid pSCV50:NC_006855.1/AY509003.1 |
| Enteritidis str. P125109 | 4.68585 | 52.2 | chromosome:NC_011294.1/AM933172.1 |
| Gallinarum str. 287/91 | 4.6587 | 52.2 | chromosome:NC_011274.1/AM933173.1 |
| Newport str. SL254 | 5.00772 | 52.21 | chromosome:NC_011080.1/CP001113.1  plasmid pSL254_3:NC_011079.1/CP001112.1  plasmid pSN254:NC_009140.1/CP000604.1 |
| Heidelberg str. 41578 | 4.95148 | 52.12 | chromosome: NC_021810.1/CP004086.1  plasmid pSEEH1578_01:NC_021811.1/CP004087.1  plasmid pSEEH1578_02:NC_021841.1/CP004088.1  plasmid pSEEH1578_03:NC_021869.1/CP004857.1 |
| Schwarzengrund str. CVM19633 | 4.82389 | 52.24 | chromosome:NC_011094.1/CP001127.1  plasmid pCVM19633_110:NC_011092.1/CP001125.1  plasmid pCVM19633_4:NC_011093.1/CP001126.1 |
| Agona str. SL483 | 4.83664 | 52.01 | chromosome:NC_011149.1/CP001138.1  plasmid unnamed:NC_011148.1/CP001137.1 |
| Dublin str. CT_02021853 | 4.91746 | 52.15 | chromosome:NC_011205.1/CP001144.1  plasmid pCT02021853_74:NC_011204.1/CP001143.1 |
| Typhimurium str. 14028S | 4.9641 | 52.22 | chromosome:NC_016856.1/CP001363.1  plasmid unnamed:NC_016855.1/CP001362.1 |
| Typhimurium str. LT2 | 4.95142 | 52.22 | chromosome:NC_003197.2/AE006468.2  plasmid pSLT:NC_003277.2/AE006471.2 |
| Tennessee str. TXSC_TXSC08-19 | 4.86441 | 52.20 | chromosome:NZ_CP007505.1/CP007505.1 |
